# Supplementary material for: Phospho-dependent Regulation of SAMHD1 Oligomerisation Couples Catalysis and Restriction
Source: PubMed Central journal article supplement (PMC4592219; doi:10.1371/journal.ppat.1005194), 2015-10-02
Supplement: ppat.1005194.s009.pdf [file ppat.1005194.s009.pdf]

**S1 Table. Primers used for SAMHD1 mutant synthesis**

| <b>Amplicon/Task</b>      | <b>Forward primer (5'-3')</b>                          | <b>Reverse primer (5'-3')</b>                          |
|---------------------------|--------------------------------------------------------|--------------------------------------------------------|
| SAMHD1 mutant A           | caccATGGAAGTGATCAACGACCC                               | TCAGTCCTGAGGCTTGGTGAAGTTC                              |
| SAMHD1 mutant B           | caccATGCAGCGGGCCGAC                                    | TCAGGTGTCCACGTGAATCTGcac                               |
| SAMHD1 mutant C           | GCCCCGGACCCCTAGCAATACCCCT<br>ACCATGAAAGTGATCAACGACCCC  | GGGGTCGTTGATCACTTTCATGGTAGGGGT<br>ATTGCTAGGGGTCCGGGGGC |
| SAMHD1 mutant D           | caccATGCCTGGACTGGAAGTGC                                | TCAGTCCTGAGGCTTGGTGAAGTTC                              |
| SAMHD1 mutant E           | GTTTGTACAAAAAGCAGGCTATGAA<br>AGTGATCAAC                | GGGTCGTTGATCACTTTCATAGCCTGCTTT<br>TTTG                 |
| SAMHD1 mutant F           | caccATGCAGCGGGCCGAC                                    | TCAGTCCTGAGGCTTGGTGAAGTTC                              |
| SAMHD1 mutant G           | GGTGCAGATTCACGTGGACACCGGCG<br>ACGTGATCGCCCCTCTGATCACCC | GGGTGATCAGAGGGGCGATCACGTCGCCGG<br>TGTCCACGTGAATCTGCACC |
| SAMHD1 mutant H           | GCCCCGGACCCCTAGCAATACCCCT<br>ACCATGAAAGTGATCAACGACCCC  | GGGGTCGTTGATCACTTTCATGGTAGGGGT<br>ATTGCTAGGGGTCCGGGGGC |
| SAMHD1 mutant I           | caccATGCCTGGACTGGAAGTGC                                | TCACATAGGGTCGTCCTTGAAC                                 |
| Sequencing (YFP)          | GTCTCTCCCCCTTGAACCTC                                   | AGACGGCAATATGGTGGAAA                                   |
| SAMHD1 (Puro)             | GCTgttaacATGCAGCGGGC                                   | GCTgttaacTCACATAGGGTCGTCCTT                            |
| SAMHD1 mutant F<br>(Puro) | GCCTCAGGACTGAgaattccgcccc                              | ggggcggaattcTCAGTCCTGAGGC                              |
| Sequencing (Puro)         | gtctctcccccttgaacctc                                   | ccaaaagacggcaatatggt                                   |
