# Supplementary material for: Phospho-dependent Regulation of SAMHD1 Oligomerisation Couples Catalysis and Restriction
Source: PubMed Central journal article supplement (PMC4592219; doi:10.1371/journal.ppat.1005194), 2015-10-02
Supplement: ppat.1005194.s010.pdf [file ppat.1005194.s010.pdf]

**S2 Table. Quantitative-PCR primers**

| Amplicon      | Forward primer (5'-3')        | Reverse primer (5'-3') | Probe (5'-3')                             |
|---------------|-------------------------------|------------------------|-------------------------------------------|
| Strong stop   | TAACTAGGGAACCCACTGC           | GCTAGAGATTTTCCACACTG   | FAM-<br>ACACAACAGACGGGCACAC<br>ACTA-TAMRA |
| Second strand | CTGCGTCGAGAGAGCTCCTC<br>TGGTT | TAACTAGGGAACCCACTGC    | FAM-<br>ACACAACAGACGGGCACAC<br>ACTA-TAMRA |
